# Supplementary material for: Associations of Plasma Fatty Acid Patterns during Pregnancy with Respiratory and Allergy Outcomes at School Age
Source: MDPI journal article supplement (doi:10.3390/nu12103057), 2020-10-07
Supplement: s1 [file s1]

## **Supplementary material**

### **Associations of plasma fatty acid patterns during pregnancy with respiratory and allergy outcomes at school age**

Sara M. Mensink-Bout, MD<sup>1,2</sup>, Trudy Voortman, PhD<sup>3</sup>, Marsela Dervishaj, MD<sup>1,2</sup>, Irwin K. Reiss, MD, PhD<sup>4</sup>, Johan C. de Jongste, MD, PhD<sup>2</sup>, Vincent W.V. Jaddoe, MD, PhD<sup>1,5</sup>, Liesbeth Duijts, MD, PhD<sup>2,4</sup>

<sup>1</sup>The Generation R Study Group, Erasmus MC, University Medical Center, Rotterdam, the Netherlands.

<sup>2</sup>Department of Pediatrics, Division of Respiratory Medicine and Allergology, Erasmus MC, University Medical Center, Rotterdam, the Netherlands.

<sup>3</sup>Department of Epidemiology, Erasmus MC, University Medical Center, Rotterdam, the Netherlands.

<sup>4</sup>Department of Pediatrics, Division of Neonatology, Erasmus MC, University Medical Center, Rotterdam, the Netherlands.

<sup>5</sup>Department of Pediatrics; Erasmus MC, University Medical Center, Rotterdam, the Netherlands.

**Figure S1.** Flow chart of participants included for analysis

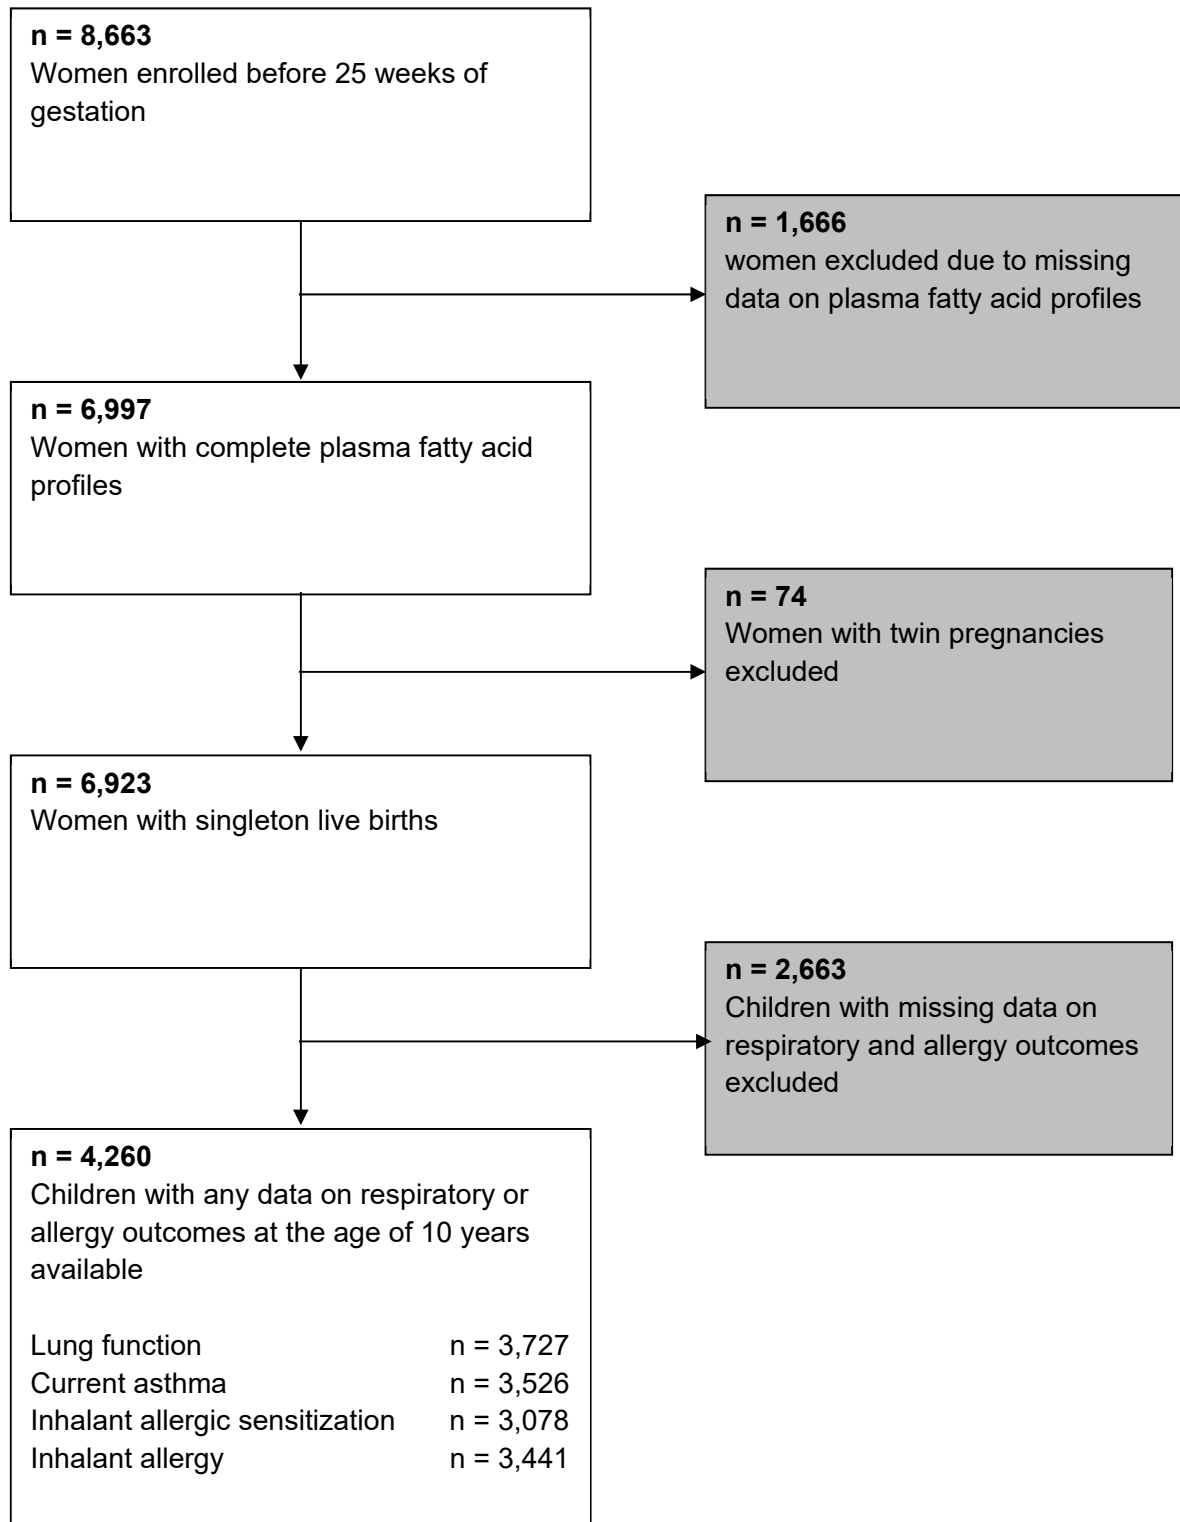

Figure S2. Factor loadings of maternal individual fatty acids in fatty acid patterns

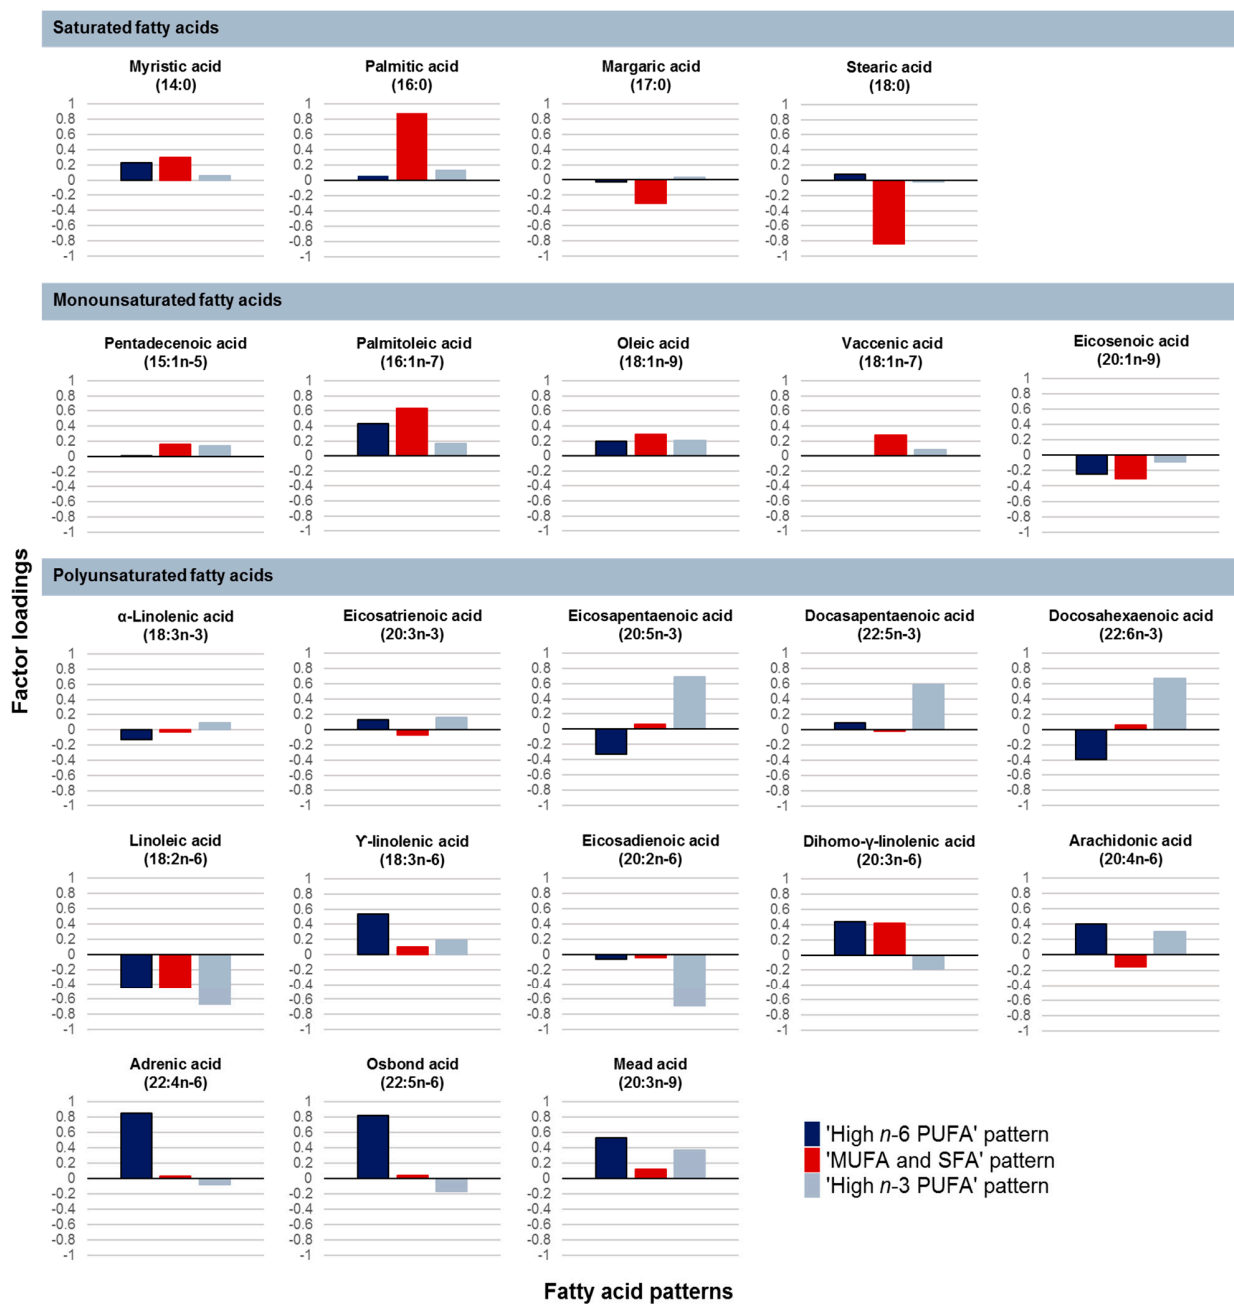

Polyunsaturated fatty acid (PUFA), monounsaturated fatty acid (MUFA), saturated fatty acid (SFA)

**Table S1.** Comparison of baseline characteristics between participants and non-participants in the analysis

|                                                                 | <b>Participants</b><br><br><b>n= 4,260</b> | <b>Non-<br/>participants</b><br><br><b>n= 2,663</b> | <b>p-value for<br/>difference</b> |
|-----------------------------------------------------------------|--------------------------------------------|-----------------------------------------------------|-----------------------------------|
| <b>Maternal characteristics</b>                                 |                                            |                                                     |                                   |
| Age, years                                                      | 30.8 (4.8)                                 | 28.1 (5.4)                                          | <b>&lt;0.001</b>                  |
| Pre-pregnancy body mass index (kg/m <sup>2</sup> ) <sup>1</sup> | 22.6 (18.0-34.6)                           | 22.8 (17.6-36.1)                                    | <b>0.027</b>                      |
| Educational level, higher (%)                                   | 50.3 (2,041)                               | 28.5 (660)                                          | <b>&lt;0.001</b>                  |
| Ethnic background, European (%)                                 | 65.7 (2,752)                               | 43.8 (1,061)                                        | <b>&lt;0.001</b>                  |
| Parity, nullipara (%)                                           | 58.5 (2,480)                               | 52.0 (1,364)                                        | <b>&lt;0.001</b>                  |
| History of asthma or atopy, yes (%)                             | 37.5 (1,651)                               | 38.1 (109)                                          | 0.766                             |
| Smoking during pregnancy, yes (%)                               | 24.4 (932)                                 | 25.2 (76)                                           | 0.763                             |
| Folic acid supplementation, yes (%)                             | 78.8 (2,597)                               | 58.8 (1,108)                                        | <b>&lt;0.001</b>                  |
| Total daily energy intake (kcal)                                | 2057 (548)                                 | 2007 (603)                                          | <b>0.003</b>                      |
| Gestational age at fatty acid measurement                       | 20.7 (1.2)                                 | 20.7 (1.3)                                          | 0.424                             |
| <b>Child characteristics</b>                                    |                                            |                                                     |                                   |
| Sex, female (%)                                                 | 50.3 (2,242)                               | 48.3 (1,286)                                        | 0.110                             |
| Gestational age at birth (weeks) <sup>1</sup>                   | 40.1 (35.7- 42.4)                          | 40.0 (35.0-42.3)                                    | <b>&lt;0.001</b>                  |
| Birth weight (grams)                                            | 3,444 (551)                                | 3,378 (576)                                         | <b>&lt;0.001</b>                  |
| Ever breastfeeding, yes (%)                                     | 93.1 (3,235)                               | 90.1 (247)                                          | 0.071                             |
| Body mass index (kg/m <sup>2</sup> )                            | 17.6 (2.8)                                 | 17.8 (2.7)                                          | 0.719                             |

Values are means (SD), medians<sup>1</sup> (2.5-97.5<sup>th</sup> percentile) or valid percentages (absolute numbers) based on observed data. P-value for difference was calculated using Student's t-test for continuous normally distributed variables, Mann-Whitney U test for continuous not normally distributed variables, and chi-square test for categorical variables.

**Table S2.** Associations of maternal fatty acid patterns in quartiles with respiratory and allergy outcomes in children at the age of 10 years

|                                | FEV <sub>1</sub>              | FVC                           | FEV <sub>1</sub> /FVC         | FEF <sub>75</sub>                   | Current<br>asthma    | Inhalant<br>allergic<br>sensitization | Inhalant<br>allergy  |
|--------------------------------|-------------------------------|-------------------------------|-------------------------------|-------------------------------------|----------------------|---------------------------------------|----------------------|
|                                | Z-score<br>change<br>(95% CI) | Z-score<br>change<br>(95% CI) | Z-score<br>change<br>(95% CI) | Z-score<br>change<br>(95% CI)       | OR<br>(95% CI)       | OR<br>(95% CI)                        | OR<br>(95% CI)       |
| Fatty acid pattern             | n = 3,727                     | n = 3,727                     | n = 3,727                     | n = 3,727                           | n = 3,526            | n = 3,078                             | n = 3,441            |
| <b>'high n-6 PUFA' pattern</b> |                               |                               |                               |                                     |                      |                                       |                      |
| Quartile 1                     | Reference                     | Reference                     | Reference                     | Reference                           | Reference            | Reference                             | Reference            |
| Quartile 2                     | -0.05<br>(-0.14, 0.04)        | -0.07<br>(-0.16, 0.01)        | 0.04<br>(-0.04, 0.13)         | 0.04<br>(-0.05, 0.12)               | 1.14<br>(0.75, 1.73) | 0.94<br>(0.75, 1.16)                  | 1.13<br>(0.85, 1.51) |
| Quartile 3                     | -0.01<br>(-0.10, 0.08)        | -0.06<br>(-0.14, 0.03)        | 0.08<br>(-0.01, 0.16)         | 0.06<br>(-0.02, 0.15)               | 1.02<br>(0.67, 1.56) | 1.06<br>(0.86, 1.32)                  | 1.03<br>(0.77, 1.39) |
| Quartile 4                     | 0.00<br>(-0.09, 0.09)         | -0.04<br>(-0.13, 0.04)        | 0.07<br>(-0.02, 0.16)         | <b>0.10</b><br><b>(0.02, 0.19)*</b> | 1.23<br>(0.81, 1.86) | 0.81<br>(0.65, 1.01)                  | 0.97<br>(0.71, 1.30) |
| <b>'MUFA and SFA' pattern</b>  |                               |                               |                               |                                     |                      |                                       |                      |
| Quartile 1                     | Reference                     | Reference                     | Reference                     | Reference                           | Reference            | Reference                             | Reference            |
| Quartile 2                     | 0.02<br>(-0.07, 0.11)         | 0.02<br>(-0.06, 0.11)         | 0.00<br>(-0.09, 0.09)         | -0.01<br>(-0.09, 0.08)              | 1.02<br>(0.66, 1.57) | 0.92<br>(0.74, 1.14)                  | 0.90<br>(0.66, 1.22) |
| Quartile 3                     | 0.05<br>(-0.04, 0.14)         | 0.06<br>(-0.02, 0.15)         | -0.03<br>(-0.12, 0.06)        | -0.00<br>(-0.08, 0.08)              | 1.18<br>(0.78, 1.79) | 1.01<br>(0.82, 1.26)                  | 1.04<br>(0.77, 1.40) |
| Quartile 4                     | 0.03<br>(-0.06, 0.12)         | 0.05<br>(-0.04, 0.14)         | -0.04<br>(-0.13, 0.05)        | -0.02<br>(-0.10, 0.07)              | 1.33<br>(0.88, 2.02) | 1.07<br>(0.86, 1.34)                  | 1.19<br>(0.89, 1.59) |

**‘high n-3 PUFA’ pattern**

|            |                                        |                        |                                        |                        |                      |                      |                      |
|------------|----------------------------------------|------------------------|----------------------------------------|------------------------|----------------------|----------------------|----------------------|
| Quartile 1 | Reference                              | Reference              | Reference                              | Reference              | Reference            | Reference            | Reference            |
| Quartile 2 | -0.07<br>(-0.16, 0.02)                 | -0.00<br>(-0.09, 0.08) | <b>-0.11</b><br><b>(-0.20, -0.02)*</b> | -0.07<br>(-0.15, 0.02) | 1.01<br>(0.67, 1.53) | 0.94<br>(0.75, 1.17) | 0.96<br>(0.70, 1.30) |
| Quartile 3 | <b>-0.09</b><br><b>(-0.18, -0.00)*</b> | -0.05<br>(-0.14, 0.04) | -0.06<br>(-0.15, 0.03)                 | -0.03<br>(-0.12, 0.05) | 1.09<br>(0.73, 1.65) | 1.10<br>(0.88, 1.37) | 1.23<br>(0.92, 1.66) |
| Quartile 4 | -0.07<br>(-0.16, 0.02)                 | -0.04<br>(-0.13, 0.05) | -0.04<br>(-0.13, 0.05)                 | -0.02<br>(-0.11, 0.06) | 1.06<br>(0.69, 1.61) | 1.20<br>(0.96, 1.51) | 1.14<br>(0.84, 1.55) |

Values are Z-score changes or odds ratios (OR) with 95% confidence interval (95% CI), derived from linear or logistic regression models per SD increase in the fatty acid patterns. Polyunsaturated fatty acid (PUFA), monounsaturated fatty acid (MUFA), saturated fatty acid (SFA), Forced Expiratory Flow in 1 second (FEV<sub>1</sub>), Forced Vital Capacity (FVC), Forced Expiratory Flow after exhaling 75% of FVC (FEF<sub>75</sub>). Fatty acids are classified into three patterns, derived from principal component analysis: ‘High n6 PUFA’ pattern, ‘MUFA and SFA’ pattern, and ‘High n-3 PUFA’ pattern. Models were adjusted for maternal age, pre-pregnancy body mass index, educational level, ethnic background, parity, smoking during pregnancy, folic acid supplementation, total daily energy intake, and gestational age at fatty acid measurement, and child’s sex and breastfeeding. Bold indicates \*p-value <0.05 and \*\*p-value <0.01.

**Table S3.** Associations of maternal fatty acid patterns with asthma severity divided in groups based on wheezing episodes

| Fatty acid pattern      | No current asthma | Current asthma<br>without wheezing | Current asthma with<br><4 wheezing | Current asthma with<br>≥4 wheezing |
|-------------------------|-------------------|------------------------------------|------------------------------------|------------------------------------|
|                         | Odds ratio        | episodes                           | episodes                           | episodes                           |
|                         | (95% CI)          | Odds ratio                         | Odds ratio                         | Odds ratio                         |
|                         | n = 3,324         | (95% CI)<br>n = 98                 | (95% CI)<br>n = 78                 | (95% CI)<br>n = 24                 |
| 'high n-6 PUFA' pattern | Reference         | 0.96 (0.77, 1.18)                  | 1.22 (0.97, 1.54)                  | 1.03 (0.68, 1.55)                  |
| 'MUFA and SFA' pattern  | Reference         | 1.03 (0.83, 1.28)                  | 1.19 (0.93, 1.51)                  | 1.15 (0.75, 1.76)                  |
| 'high n-3 PUFA' pattern | Reference         | 1.00 (0.81, 1.24)                  | 1.03 (0.81, 1.31)                  | 1.07 (0.70, 1.62)                  |

Values are odds ratios with 95% confidence interval (95% CI), derived from multinomial logistic regression models per SD increase in the fatty acid patterns. Polyunsaturated fatty acid (PUFA), monounsaturated fatty acid (MUFA), saturated fatty acid (SFA). Fatty acids are classified into three patterns, derived from principal component analysis: 'High n6 PUFA' pattern, 'MUFA and SFA' pattern, and 'High n-3 PUFA' pattern. Models were adjusted for maternal age, pre-pregnancy body mass index, educational level, ethnic background, parity, smoking during pregnancy, folic acid supplementation, total daily energy intake, and gestational age at fatty acid measurement, and child's sex and breastfeeding.

**Table S4.** Associations of maternal fatty acid patterns in with respiratory outcomes in children at the age of 10 years, stratified by maternal ethnic background, maternal history of asthma or atopy and child's sex

|                                | Maternal ethnic background |                           | Maternal asthma or atopy |                      | Child's sex          |                      |
|--------------------------------|----------------------------|---------------------------|--------------------------|----------------------|----------------------|----------------------|
|                                | European<br>n = 2,760      | Non-European<br>n = 1,500 | No<br>n = 2,620          | Yes<br>n = 1,640     | Boy<br>n = 2,118     | Girl<br>n = 2,142    |
|                                | <b>FEF<sub>75</sub></b>    |                           |                          |                      |                      |                      |
| <b>'high n-3 PUFA' pattern</b> | -0.04<br>(-0.08, 0.00)     | 0.04<br>(-0.01, 0.10)     | NA                       | NA                   | NA                   | NA                   |
| <i>P-value for interaction</i> | 0.01                       |                           |                          |                      |                      |                      |
|                                | <b>Current asthma</b>      |                           |                          |                      |                      |                      |
| <b>'high n-6 PUFA' pattern</b> | NA                         | NA                        | 1.20<br>(0.97, 1.48)     | 0.94<br>(0.76, 1.17) | NA                   | NA                   |
| <i>P-value for interaction</i> | 0.10                       |                           |                          |                      |                      |                      |
|                                | <b>Inhalant allergy</b>    |                           |                          |                      |                      |                      |
| <b>'high n-6 PUFA' pattern</b> | NA                         | NA                        | 1.09<br>(0.94, 1.26)     | 0.86<br>(0.72, 1.01) | 1.06<br>(0.92, 1.23) | 0.87<br>(0.74, 1.02) |
| <i>P-value for interaction</i> | 0.07                       |                           |                          |                      |                      | 0.05                 |

Values are Z-score changes with 95% confidence interval, derived from linear regression models per SD increase in the fatty acid patterns. Polyunsaturated fatty acid (PUFA), monounsaturated fatty acid (MUFA), saturated fatty acid (SFA), Forced Expiratory Flow after exhaling 75% of FVC (FEF<sub>75</sub>). Fatty acids are classified into three patterns, derived from principal component analysis: 'High n6 PUFA' pattern, 'MUFA and SFA' pattern, and 'High n-3 PUFA' pattern. Models were adjusted for maternal age, pre-pregnancy body mass index, educational level, ethnic background, parity, smoking during pregnancy, folic acid supplementation, total daily energy intake, and gestational age at fatty acid measurement, and child's sex and breastfeeding. Not applicable (NA).



**Table S5.** Associations of maternal fatty acid patterns in with respiratory outcomes in children at the age of 10 years, stratified by current asthma, inhalant allergic sensitization and inhalant allergy

|                                | Current asthma        |                       | Inhalant allergic sensitization |                       | Inhalant allergy       |                       |
|--------------------------------|-----------------------|-----------------------|---------------------------------|-----------------------|------------------------|-----------------------|
|                                | No<br>n = 3,324       | Yes<br>n = 202        | No<br>n = 2,071                 | Yes<br>n = 1,007      | No<br>n = 3,020        | Yes<br>n = 421        |
|                                | FVC                   |                       |                                 |                       |                        |                       |
| ‘high n-6 PUFA’ pattern        | NA                    | NA                    | NA                              | NA                    | -0.03<br>(-0.06, 0.01) | 0.09<br>(-0.02, 0.20) |
| <i>P-value for interaction</i> | 0.07                  |                       |                                 |                       |                        |                       |
|                                | FEV <sub>1</sub> /FVC |                       |                                 |                       |                        |                       |
| ‘high n-6 PUFA’ pattern        | NA                    | NA                    | 0.07<br>(0.03, 0.12)**          | 0.01<br>(-0.06, 0.08) | NA                     | NA                    |
| <i>P-value for interaction</i> | 0.05                  |                       |                                 |                       |                        |                       |
|                                | FEF <sub>75</sub>     |                       |                                 |                       |                        |                       |
| ‘high n-6 PUFA’ pattern        | 0.04<br>(0.00, 0.07)* | 0.16<br>(-0.00, 0.32) | 0.08<br>(0.03, 0.12)**          | 0.02<br>(-0.04, 0.09) | NA                     | NA                    |
| <i>P-value for interaction</i> | 0.05                  |                       |                                 |                       |                        |                       |

Values are Z-score changes with 95% confidence interval, derived from linear regression models per SD increase in the fatty acid patterns.

Polyunsaturated fatty acid (PUFA), Forced Expiratory Flow in 1 second (FEV<sub>1</sub>), Forced Vital Capacity (FVC), Forced Expiratory Flow after exhaling 75% of FVC (FEF<sub>75</sub>). Fatty acids are classified into three patterns, derived from principal component analysis: ‘High n6 PUFA’ pattern, ‘MUFA and SFA’ pattern, and ‘High n-3 PUFA’ pattern. Models were adjusted for maternal age, pre-pregnancy body mass index, educational level, ethnic background, parity, smoking during pregnancy, folic acid supplementation, total daily energy intake, and gestational age at fatty acid measurement, and child’s sex and breastfeeding. Not applicable (NA). \*p-value <0.05 and \*\*p-value <0.01.
